# Supplementary material for: Chemistry of enzymatic browning in longan fruit as a function of pericarp pH and dehydration and its prevention by essential oil, an alternative approach to SO2 fumigation
Source: PeerJ journal article supplement (doi:10.7717/peerj.11539), 2021-06-14
Supplement: Supplement_file_(Raw_data).zip [file Supplement_file_%28Raw_data%29.zip]

## Sheet: All data in triplicate
Days	Treatments	Replicates	L*	a*	b*	c*	h	Titratable acidity	Total soluble solid	pH Pericarp	Wt. loss	BI Index	Disease Develop.	Firmness(peel)	Firmness(flesh)	Ethanol (mol/L of juice	Respiration rate	Thymol residues
0	T1 (Thymol)	1	66.0267	3.61333	23.5167	23.7963	81.1958	0.20096	19.2	4.7	0	1	0	18.8133	1.67	0.0693157	25.732	123.3
0	T1 (Thymol)	2	66.8067	3.63	24.33	24.6033	81.537	0.19328	20	4.8	0	1	0	18.92	3.45333	0.0710916	25.6054	157.124
0	T1 (Thymol)	3	54.6833	3.76333	19.4933	19.8568	78.9377	0.19712	19.6	4.75	0	1	0	16.8567	2.73333	0.0668294	24.8714	147.48
0	T2 (D. water)	1	49.7967	2.35667	16.2067	16.3817	81.9105	0.22016	19.3	4.39	0	1	0	19.7	1.66667	0.0811135	27.7212
0	T2 (D. water)	2	53.2067	1.72667	19.6533	19.7448	85.0522	0.2304	19.3	4.38	0	1	0	17.1633	2.89333	0.0638817	25.9704
0	T2 (D. water)	3	49.7867	2.96333	17.66	17.9082	80.5375	0.224	19.6	4.39	0	1	0	15.09	2.24	0.059508	26.5128
7	T1 (Thymol)	1	59.4267	3.41333	27.6	27.8141	82.9598	0.18176	18	4.82	0.205791	1.29032	0	15.6767	2.25667	0.0996011	19.6128	18.5537
7	T1 (Thymol)	2	63.8967	4.25333	28.5933	28.9084	81.5553	0.18432	19	4.81	0.303147	1.28333	0	12.3367	2.10333	0.0657399	19.6994	14.3652
7	T1 (Thymol)	3	52.1	3.69333	25.1033	25.3903	81.5345	0.17152	18.8	4.86	0.267755	1.37097	0	15.2167	2.44333	0.0712008	19.4222	20.9421
7	T2 (D. water)	1	59.3033	3.51333	25.7	25.9537	82.231	0.18816	18	4.8	0.247973	1.72059	0	14.3633	1.72333	0.0747161	18.4022
7	T2 (D. water)	2	53.7833	3.25333	25.1967	25.4086	82.6953	0.1792	18.8	4.79	0.31632	1.43939	0	14.0167	2.73333	0.0769017	18.859
7	T2 (D. water)	3	58.9433	4.14	28.6267	28.9261	81.8204	0.17792	18.8	4.83	0.245014	1.44444	0	13.5533	1.71	0.06495	21.1631
14	T1 (Thymol)	1	66.1467	5.15333	30.7867	31.2249	80.4499	0.16768	18.4	4.79	0.327309	2.20339	0	10.6167	1.69667	0.0921637	14.1604	18.6073
14	T1 (Thymol)	2	53.6567	3.73667	24.9333	25.2192	81.4752	0.18944	18.8	4.82	0.558683	2.19697	0	17.6133	2.03	0.0927263	14.1043	14.1906
14	T1 (Thymol)	3	51.4	3.41	23.8233	24.069	81.8524	0.18432	18.8	4.86	0.45149	1.89231	0	13.94	2.67333	0.0795321	15.8414	18.5583
14	T2 (D. water)	1	54.6333	4.00333	25.71	26.0243	81.1496	0.18304	19	5.37	0.411405	2.53333	11.6667	15.0333	1.48667	0.114913	21.6658
14	T2 (D. water)	2	61.4933	4.57667	27.5933	27.9738	80.6517	0.1728	18.2	5.38	0.463453	2.52941	6.25	11	1.67667	0.100544	21.845
14	T2 (D. water)	3	55.5433	4.76	23.96	24.4347	78.7803	0.17792	18	5.35	0.35176	2.63077	12.3077	13.3733	2.07333	0.124596	23.3659
21	T1 (Thymol)	1	50.5	2.93	22.2333	22.4325	82.593	0.18688	17.8	4.92	0.531087	2.59091	3.22581	14.8067	2.03	0.102214	18.3968	10.7502
21	T1 (Thymol)	2	50.8967	5.34	24.1267	24.7284	77.4425	0.18304	18.2	4.96	0.545816	2.80882	4.7619	14.2267	1.61667	0.0830539	17.7567	10.5927
21	T1 (Thymol)	3	50.6933	4.44	23.93	24.3565	79.3916	0.1792	18.4	4.91	0.525662	2.6087		14.55	2.31	0.0824498	15.8803	10.0151
21	T2 (D. water)	1	42.54	4.92	19.1867	19.8086	75.6656	0.16768	18	5.66	0.588025	3	32.8125	10.2667	2.09667	0.1169	29.0581
21	T2 (D. water)	2	43.8567	4.09	18.8933	19.3333	77.8133	0.17792	18.2	5.68	0.56435	3.125	38.0952	8.73	1.58667	0.14924	24.5953
21	T2 (D. water)	3	43.9633	3.50667	17.8	18.1446	78.9785	0.1728	18	5.68	0.582491	3.17241	40.678	9.54	1.92	0.124708	29.1877
28	T1 (Thymol)	1	41.2767	4.59	18.0133	18.6029	75.3405	0.16768	18	4.92	0.908119	2.75806	4.83871	13.75	1.73	0.106706	18.083	9.66571
28	T1 (Thymol)	2	47.27	3.82	21.84	22.1738	80.0784	0.16384	18	4.94	0.852117	2.55	6.45161	14.7767	1.36	0.101633	20.5931	9.84175
28	T1 (Thymol)	3	50.7	5.11333	24.41	24.9405	78.19	0.17152	18	4.88	0.665402	2.47458	10.1695	12.57	2	0.114941	16.8144
28	T2 (D. water)	1	46.0467	3.84	21.1733	21.5426	79.4801	0.16	17.4	5.65	1.21011	3.7971	86.1538	7.52667	1.24667	0.150875	41.1296
28	T2 (D. water)	2	37.75	3.46	15.6033	15.9866	77.409	0.15616	17.6	5.66	1.02199	3.69565	76.9231	6.66333	0.483333	0.154314	48.4048
28	T2 (D. water)	3	38.4633	3.22667	16.1367	16.4566	78.7043	0.15104	17.1	5.68	0.80927	3.81429	77.7778	4.89667	0.216667	0.147891	44.4896
35	T1 (Thymol)	1	45.1933	4.24	19.6133	20.0718	77.6404	0.16512	18	5.517	0.762241	3.01538	19.403	8.80333	2.21667	0.129927	21.221	11.3428
35	T1 (Thymol)	2	49.15	5.06	22.6867	23.2443	77.4556	0.16384	17.8	5.58	0.829104	3.22727	15.625	10.16	1.91333	0.142626	17.9898	11.4426
35	T1 (Thymol)	3	44.5533	4.03	20.2133	20.6132	78.7016	0.15872	18	5.61	0.935789	3.11667	16.3934	7.09333	1.4	0.139738	18.4103	10.7103
42	T1 (Thymol)	1	42.47	4.69667	18.2667	18.9491	74.8996	0.15616	17	5.67	1.04979	3.34426	37.7049	11.4033	1.59667	0.17112	43.509
42	T1 (Thymol)	2	40.72	4.84333	17.1433	17.8339	74.2123	0.15232	17.4	5.48	1.09048	3.5082	29.5082	6.89	1.68333	0.16352	40.7588
42	T1 (Thymol)	3	44.0933	4.14667	20.09	20.5242	78.5284	0.15488	17.2	5.48	1.03065	3.30159	33.3333	6.60667	3.02667	0.14623	37.7157

## Sheet: TPC, TFC, PPO, POD (6 replicate
Days	Treatments	Replicates	TPC (mg/g fruit)	TFC (mg/g fruit)	PPO (Unit/min/mg Ptn)	POD (Unit/min/mg Ptn)
0	T1 (Thymol)	1	17.7	6.73333	51.0342	80.4175
0	T1 (Thymol)	2	17.37	6.78333	36.453	81.3012
0	T1 (Thymol)	3	16.95	8.65	34.4204	100.828
0	T1 (Thymol)	4	17.94	8.15	43.9817	63.278
0	T1 (Thymol)	5	16.71	7.9	36.1142	71.8635
0	T1 (Thymol)	6	16.68	7.96667	40.1268	72.9579
0	T2 (D. water)	1	19.47	7.11667	45.0258	41.6767
0	T2 (D. water)	2	16.38	6.93333	40.9325	47.6306
0	T2 (D. water)	3	19.26	8.13333	58.6948	78.5443
0	T2 (D. water)	4	22.89	7.63333	49.3036	67.4457
0	T2 (D. water)	5	17.22	8.81667	51.383	59.9468
0	T2 (D. water)	6	19.53		42.8191	58.779
7	T1 (Thymol)	1	15.69	4.1	26.8835	151.525
7	T1 (Thymol)	2	15.48	4.2	48.3903	134.418
7	T1 (Thymol)	3	14.1	3.71667	47.4036	177.447
7	T1 (Thymol)	4	14.43	4.13333	36.2498	169.842
7	T1 (Thymol)	5	16.77		38.2516	134.46
7	T1 (Thymol)	6	16.74		30.6013	150.688
7	T2 (D. water)	1	15.93	6.35	80.9631	115.377
7	T2 (D. water)	2	16.59	4.86667	65.6458	121.345
7	T2 (D. water)	3	17.64	4.46667	79.7739	175.726
7	T2 (D. water)	4	19.62	4.56667	98.1833	119.94
7	T2 (D. water)	5	17.58		55.2281	96.6957
7	T2 (D. water)	6	15.57		57.2736	72.5217
14	T1 (Thymol)	1	15.03	4.58333	84.2058	378.725
14	T1 (Thymol)	2	15.36	4.75	124.093	265.913
14	T1 (Thymol)	3	16.44	4.13333	123.141	250.013
14	T1 (Thymol)	4	16.53	4.3	90.3034	186.577
14	T1 (Thymol)	5	15.6		69.3195	236.316
14	T1 (Thymol)	6	16.23		82.3169	228.439
14	T2 (D. water)	1	15.9	4.13333	121.583	422.024
14	T2 (D. water)	2	16.44	3.96667	110.53	286.373
14	T2 (D. water)	3	17.55	3.43333	142.012	418.291
14	T2 (D. water)	4	14.16	3.6	153.373	356.322
14	T2 (D. water)	5	14.58		115.275	301.288
14	T2 (D. water)	6	14.94		105.669	314.387
21	T1 (Thymol)	1	17.46	3.55	93.6919	553.634
21	T1 (Thymol)	2	17.55	4.01667	85.8843	560.732
21	T1 (Thymol)	3	17.79	4.76667	167.145	600.894
21	T1 (Thymol)	4	17.55	4.63333	129.158	545.64
21	T1 (Thymol)	5	17.49	4.88333	58.9494	556
21	T1 (Thymol)	6	17.79	4.71667	117.899	736.867
21	T2 (D. water)	1	11.61	4	155.569	574.025
21	T2 (D. water)	2	11.16	3.98333	155.569	490.833
21	T2 (D. water)	3	11.49	4.28333	167.222	844.557
21	T2 (D. water)	4	12.33	4.61667	195.093	675.646
21	T2 (D. water)	5	13.29	3.5	222.08	797.948
21	T2 (D. water)	6	13.23	3.58333	211.504	826.79
28	T1 (Thymol)	1	15.63	3.25	199.435	1504.83
28	T1 (Thymol)	2	16.23	3.45	239.322	1649.87
28	T1 (Thymol)	3	17.85	5.2	152.195	1229.86
28	T1 (Thymol)	4	17.58	5.35	202.927	999.263
28	T1 (Thymol)	5	18.6	4.41667	236.748	1199.12
28	T1 (Thymol)	6	18.03	4.51667	202.927	1352.85
28	T2 (D. water)	1	10.56	2.45	219.549	1568.21
28	T2 (D. water)	2	10.59	3.11667	230.003	1558.7
28	T2 (D. water)	3	11.25	4.11667	314.537	1727.57
28	T2 (D. water)	4	12.33	4.13333	340.749	1715.66
28	T2 (D. water)	5	8.16	4.23333	261.396	1608.59
28	T2 (D. water)	6	11.1	4.3	221.181	1480.64
35	T1 (Thymol)	1	17.79	3.35	154.69	773.452
35	T1 (Thymol)	2	17.73	3.56667	137.503	796.89
35	T1 (Thymol)	3	19.98	4.23333	242.332	472.075
35	T1 (Thymol)	4	20.19	4.21667	207.713	933.66
35	T1 (Thymol)	5	19.5	4.25	227.851	828.549
35	T1 (Thymol)	6	20.13	4.21667	251.835	926.667
42	T1 (Thymol)	1	17.67	3.21667	106.701	712.748
42	T1 (Thymol)	2	17.73	3.03333	129.897	586.225
42	T1 (Thymol)	3	19.71	3.06667	132.636	589.494
42	T1 (Thymol)	4	19.65	3.01667	152.286	607.357
42	T1 (Thymol)	5	18.9	3.53333	208.17	616.148
42	T1 (Thymol)	6	19.71	3.71667	183.964	734.976
